# Supplementary material
Source: publisher site journal article supplement (https://www.dovepress.com/article/575341)
Supplement: Supplementary file 1 [file Supplementary%20file.pdf]

1 **Supplementary Table 1.** Smoking prevalence according to sex and age

| Characteristics       | n=2230      |             |
|-----------------------|-------------|-------------|
| <b>Sex</b>            |             |             |
| Male (%)              | 981(44.0%)  |             |
| Female (%)            | 1249(56.0%) |             |
| <hr/>                 |             |             |
| Median age (range)    | 68 (40-93)  |             |
| <b>Age categories</b> |             |             |
| 40-49 years (%)       | 112 (5.0%)  |             |
| 50-59 years (%)       | 253 (11.3%) |             |
| 60-69 years (%)       | 899 (40.3%) |             |
| 70-79 years (%)       | 878 (39.4%) |             |
| ≥80 years (%)         | 88 (3.9%)   |             |
| <hr/>                 |             |             |
| <b>Smoking status</b> |             |             |
| <b>Male</b>           |             |             |
| 40-49 years           | Current (%) | 31 (49.2)   |
|                       | Former (%)  | 16 (25.4)   |
|                       | Never (%)   | 16 (25.4)   |
| 50-59 years           | Current (%) | 125 (44.8)  |
|                       | Former (%)  | 46 (36.8)   |
|                       | Never (%)   | 23 (18.4)   |
| 60-69 years           | Current (%) | 101 (27.1)  |
|                       | Former (%)  | 173 (46.4)  |
|                       | Never (%)   | 99 (26.5)   |
| 70-79 years           | Current (%) | 48 (12.8)   |
|                       | Former (%)  | 184 (48.9)  |
|                       | Never (%)   | 144 (38.3)  |
| ≥80 years             | Current (%) | 4 (9.1)     |
|                       | Former (%)  | 23 (52.3)   |
|                       | Never (%)   | 17 (38.6)   |
| total                 | Current (%) | 240 (24.5%) |
|                       | Former (%)  | 442 (45.0%) |

|             | Never (%)   | 299 (30.5%)  |
|-------------|-------------|--------------|
| <hr/>       |             |              |
| Female      |             |              |
| 40-49 years | Current (%) | 2 (4.1)      |
|             | Former (%)  | 6 (12.2)     |
|             | Never (%)   | 41 (83.7)    |
| 50-59 years | Current (%) | 7 (5.5)      |
|             | Former (%)  | 6 (4.7)      |
|             | Never (%)   | 115 (89.8)   |
| 60-69 years | Current (%) | 8 (1.5)      |
|             | Former (%)  | 5 (1.0)      |
|             | Never (%)   | 513 (97.5)   |
| 70-79 years | Current (%) | 5 (10)       |
|             | Former (%)  | 6 (1.2)      |
|             | Never (%)   | 491 (97.8)   |
| ≥80 years   | Current (%) | 0 (0.0)      |
|             | Former (%)  | 0 (0.0)      |
|             | Never (%)   | 44 (100)     |
| total       | Current (%) | 22 (1.8%)    |
|             | Former (%)  | 23 (1.8%)    |
|             | Never (%)   | 1204 (96.4%) |

2

3

4 **Supplementary Figure 1**

5 **Age-stratified analysis of FEV<sub>1</sub>/FVC differences across questionnaire**  
6 **items among 727 smokers.**

7 Mean FEV<sub>1</sub>/FVC values with 95% confidence intervals are shown for symptom-  
8 positive and symptom-negative groups in each age category.

9 (A) Q5(1), cough in winter.

10 (B) Q5(2), sputum in winter.

11 (C) Q5(3), dyspnea when climbing stairs or slopes.

12 (D) Q6, chronic cough lasting more than 3 months.

13 (E) Q7, weather-related cough.

14 (F) Q8, chronic sputum lasting more than 3 months.

15 (G) Q9, sputum without a cold.

16 (H) Q10, morning sputum.

17 (I) Q11, exertional dyspnea.

18 (J) Q12, paroxysmal dyspnea.

19 (K) Q13, allergic symptoms such as rhinitis.

20 Results of 11 respiratory symptom questions (Q5–Q13) are displayed for 727  
21 smokers. Mean FEV<sub>1</sub>/FVC values and 95% confidence intervals are shown for  
22 each age category (40–49, 50–59, 60–69, 70–79, and ≥80 years).

23

24

25

26

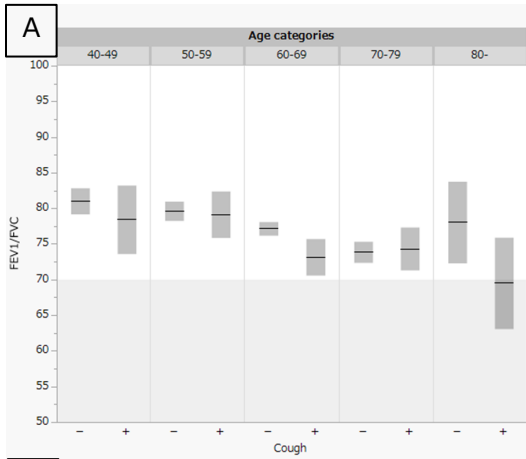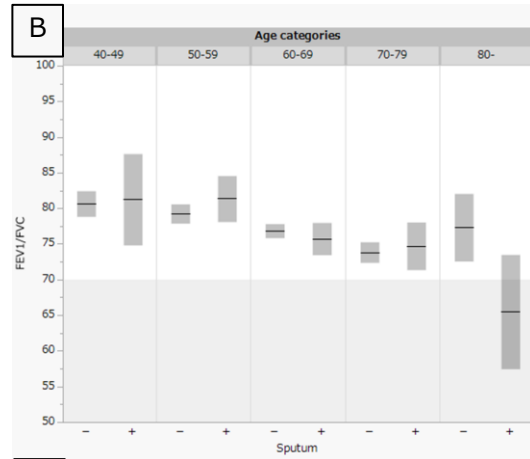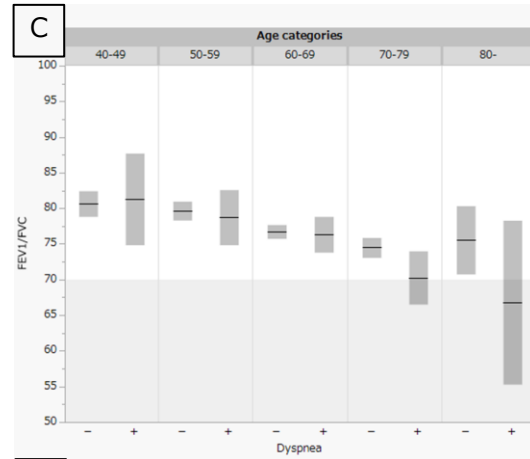

95% confidence interval

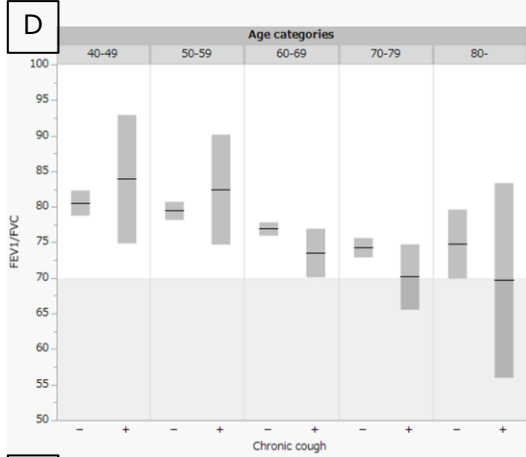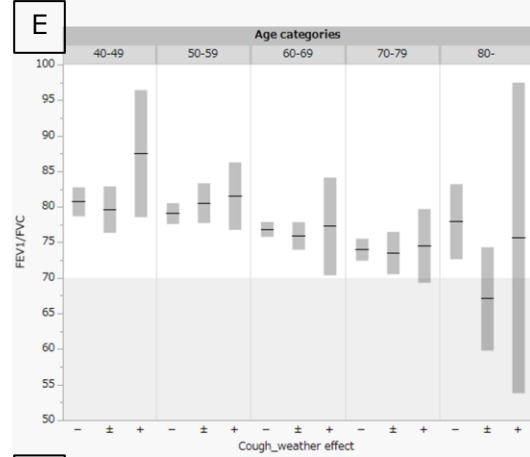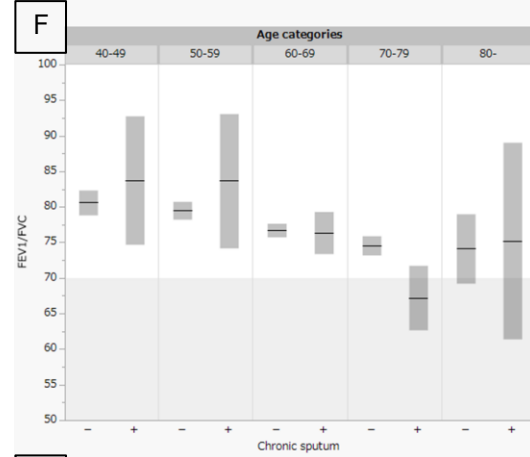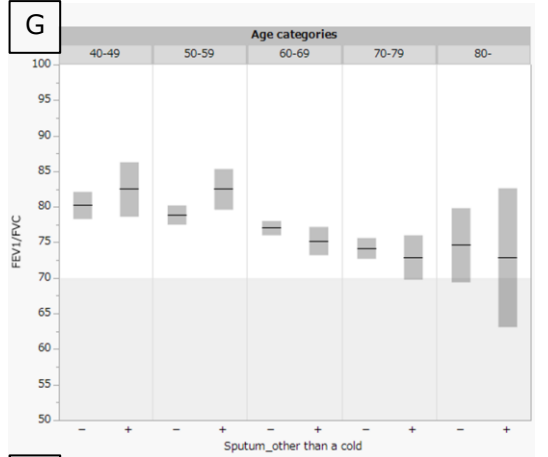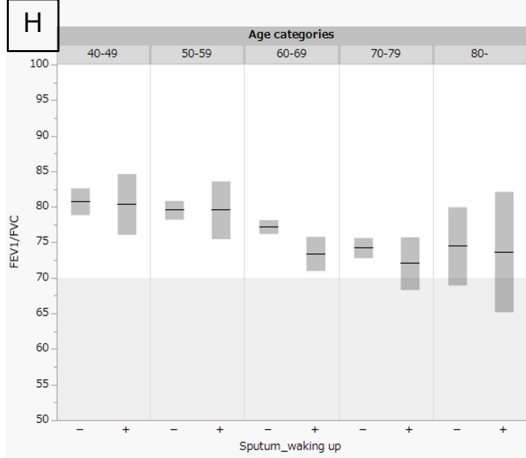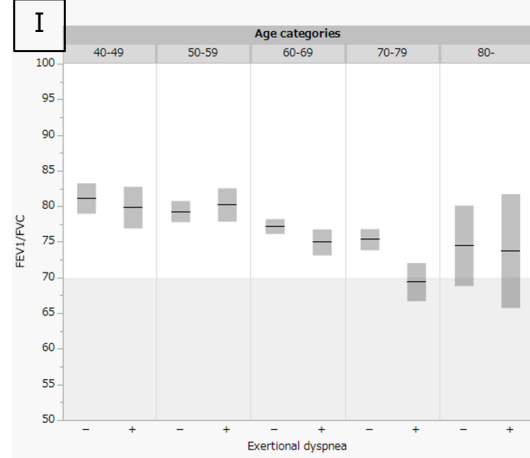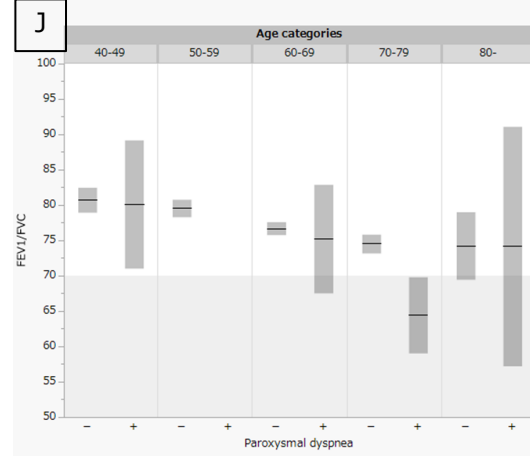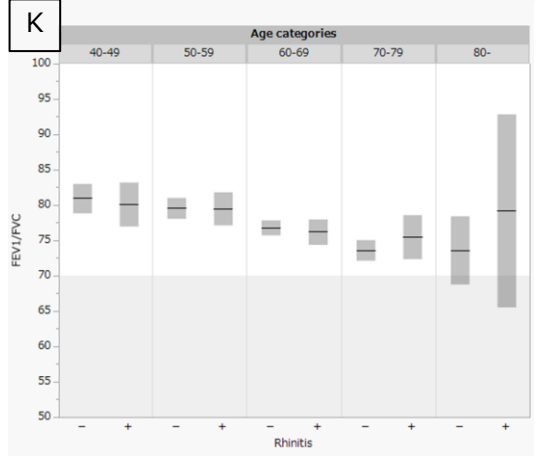

27 **Supplementary Figure 2**

28 **Predicted FEV<sub>1</sub>/FVC according to age, smoking intensity, and dyspnea**  
29 **symptoms.**

30 Predicted values were calculated using the regression formula derived from four  
31 explanatory variables: age, smoking intensity (pack-years), exertional dyspnea  
32 (Q11), and paroxysmal dyspnea (Q12).

33 Panels represent combinations of symptom presence/absence:

34 (A) Q11(-)/Q12(-), (B) Q11(+)/Q12(-), (C) Q11(-)/Q12(+), (D) Q11(+)/Q12(+).

35 Gray-shaded cells indicate predicted FEV<sub>1</sub>/FVC < 70%, suggesting probable  
36 COPD.

37

A) Q11 No/ Q12 No  
 C) Q11 No / Q12 Yes

B) Q11 Yes / Q12 No  
 D) Q11 Yes / Q12 Yes

Q11 exertional dyspnea  
 Q12 paroxysmal dyspnea

| Predicted FEV1/EVC (%) | Pack-year |      |      |      |      |      |      |      |      |      |      |      |      |      |      |      |      |      |      |      |      |      |      |
|------------------------|-----------|------|------|------|------|------|------|------|------|------|------|------|------|------|------|------|------|------|------|------|------|------|------|
|                        | 0         | 5    | 10   | 15   | 20   | 25   | 30   | 35   | 40   | 45   | 50   | 55   | 60   | 65   | 70   | 75   | 80   | 85   | 90   | 95   | 100  | 105  | 110  |
| Age 40                 | 85.2      | 84.8 | 84.3 | 83.8 | 83.4 | 82.9 | 82.4 | 82.0 | 81.5 | 81.0 | 80.6 | 80.1 | 79.7 | 79.2 | 78.7 | 78.3 | 77.8 | 77.3 | 76.9 | 76.4 | 75.9 | 75.5 | 75.0 |
| 45                     | 84.2      | 83.7 | 83.3 | 82.8 | 82.4 | 81.9 | 81.4 | 81.0 | 80.5 | 80.0 | 79.6 | 79.1 | 78.6 | 78.2 | 77.7 | 77.2 | 76.8 | 76.3 | 75.8 | 75.4 | 74.9 | 74.4 | 74.0 |
| 50                     | 83.2      | 82.7 | 82.3 | 81.8 | 81.3 | 80.9 | 80.4 | 79.9 | 79.5 | 79.0 | 78.5 | 78.1 | 77.6 | 77.1 | 76.7 | 76.2 | 75.7 | 75.3 | 74.8 | 74.3 | 73.9 | 73.4 | 72.9 |
| 55                     | 82.2      | 81.7 | 81.2 | 80.8 | 80.3 | 79.8 | 79.4 | 78.9 | 78.4 | 78.0 | 77.5 | 77.0 | 76.6 | 76.1 | 75.6 | 75.2 | 74.7 | 74.2 | 73.8 | 73.3 | 72.9 | 72.4 | 71.9 |
| 60                     | 81.1      | 80.7 | 80.2 | 79.7 | 79.3 | 78.8 | 78.3 | 77.9 | 77.4 | 76.9 | 76.5 | 76.0 | 75.5 | 75.1 | 74.6 | 74.2 | 73.7 | 73.2 | 72.8 | 72.3 | 71.8 | 71.4 | 70.9 |
| 65                     | 80.1      | 79.6 | 79.2 | 78.7 | 78.2 | 77.8 | 77.3 | 76.8 | 76.4 | 75.9 | 75.5 | 75.0 | 74.5 | 74.1 | 73.6 | 73.1 | 72.7 | 72.2 | 71.7 | 71.3 | 70.8 | 70.3 | 69.9 |
| 70                     | 79.1      | 78.6 | 78.2 | 77.7 | 77.2 | 76.8 | 76.3 | 75.8 | 75.4 | 74.9 | 74.4 | 74.0 | 73.5 | 73.0 | 72.6 | 72.1 | 71.6 | 71.2 | 70.7 | 70.2 | 69.8 | 69.3 | 68.8 |
| 75                     | 78.1      | 77.6 | 77.1 | 76.7 | 76.2 | 75.7 | 75.3 | 74.8 | 74.3 | 73.9 | 73.4 | 72.9 | 72.5 | 72.0 | 71.5 | 71.1 | 70.6 | 70.1 | 69.7 | 69.2 | 68.7 | 68.3 | 67.8 |
| 80                     | 77.0      | 76.6 | 76.1 | 75.6 | 75.2 | 74.7 | 74.2 | 73.8 | 73.3 | 72.8 | 72.4 | 71.9 | 71.4 | 71.0 | 70.5 | 70.0 | 69.6 | 69.1 | 68.7 | 68.2 | 67.7 | 67.3 | 66.8 |
| 85                     | 76.0      | 75.5 | 75.1 | 74.6 | 74.1 | 73.7 | 73.2 | 72.7 | 72.3 | 71.8 | 71.3 | 70.9 | 70.4 | 70.0 | 69.5 | 69.0 | 68.6 | 68.1 | 67.6 | 67.2 | 66.7 | 66.2 | 65.8 |
| 90                     | 75.0      | 74.5 | 74.0 | 73.6 | 73.1 | 72.7 | 72.2 | 71.7 | 71.3 | 70.8 | 70.3 | 74.5 | 69.4 | 68.9 | 68.5 | 68.0 | 67.5 | 67.1 | 66.6 | 66.1 | 65.7 | 65.2 | 64.7 |
| 95                     | 74.0      | 73.5 | 73.0 | 72.6 | 72.1 | 71.6 | 71.2 | 70.7 | 70.2 | 69.8 | 69.3 | 68.8 | 68.4 | 67.9 | 67.4 | 67.0 | 66.5 | 66.0 | 65.6 | 65.1 | 64.6 | 64.2 | 63.7 |
| 100                    | 72.9      | 72.5 | 72.0 | 71.5 | 71.1 | 70.6 | 70.1 | 69.7 | 69.2 | 68.7 | 68.3 | 67.8 | 67.3 | 66.9 | 66.4 | 65.9 | 65.5 | 65.0 | 64.5 | 64.1 | 63.6 | 63.2 | 62.7 |

| Predicted FEV1/EVC (%) | Pack-year |      |      |      |      |      |      |      |      |      |      |      |      |      |      |      |      |      |      |      |      |      |      |
|------------------------|-----------|------|------|------|------|------|------|------|------|------|------|------|------|------|------|------|------|------|------|------|------|------|------|
|                        | 0         | 5    | 10   | 15   | 20   | 25   | 30   | 35   | 40   | 45   | 50   | 55   | 60   | 65   | 70   | 75   | 80   | 85   | 90   | 95   | 100  | 105  | 110  |
| Age 40                 | 79.4      | 78.9 | 78.5 | 78.0 | 77.5 | 77.1 | 76.6 | 76.1 | 75.7 | 75.2 | 74.7 | 74.3 | 73.8 | 73.3 | 72.9 | 72.4 | 71.9 | 71.5 | 71.0 | 70.6 | 70.1 | 69.6 | 69.2 |
| 45                     | 78.4      | 77.9 | 77.4 | 77.0 | 76.5 | 76.0 | 75.6 | 75.1 | 74.6 | 74.2 | 73.7 | 73.2 | 72.8 | 72.3 | 71.9 | 71.4 | 70.9 | 70.5 | 70.0 | 69.5 | 69.1 | 68.6 | 68.1 |
| 50                     | 77.3      | 76.9 | 76.4 | 75.9 | 75.5 | 75.0 | 74.5 | 74.1 | 73.6 | 73.2 | 72.7 | 72.2 | 71.8 | 71.3 | 70.8 | 70.4 | 69.9 | 69.4 | 69.0 | 68.5 | 68.0 | 67.6 | 67.1 |
| 55                     | 76.3      | 75.9 | 75.4 | 74.9 | 74.5 | 74.0 | 73.5 | 73.1 | 72.6 | 72.1 | 71.7 | 71.2 | 70.7 | 70.3 | 69.8 | 69.3 | 68.9 | 68.4 | 67.9 | 67.5 | 67.0 | 66.5 | 66.1 |
| 60                     | 75.3      | 74.8 | 74.4 | 73.9 | 73.4 | 73.0 | 72.5 | 72.0 | 71.6 | 71.1 | 70.6 | 70.2 | 69.7 | 69.2 | 68.8 | 68.3 | 67.8 | 67.4 | 66.9 | 66.4 | 66.0 | 65.5 | 65.1 |
| 65                     | 74.3      | 73.8 | 73.3 | 72.9 | 72.4 | 71.9 | 71.5 | 71.0 | 70.5 | 70.1 | 69.6 | 69.1 | 68.7 | 68.2 | 67.7 | 67.3 | 66.8 | 66.4 | 65.9 | 65.4 | 65.0 | 64.5 | 64.0 |
| 70                     | 73.2      | 72.8 | 72.3 | 71.8 | 71.4 | 70.9 | 70.4 | 70.0 | 69.5 | 69.0 | 68.6 | 68.1 | 67.7 | 67.2 | 66.7 | 66.3 | 65.8 | 65.3 | 64.9 | 64.4 | 63.9 | 63.5 | 63.0 |
| 75                     | 72.2      | 71.7 | 71.3 | 70.8 | 70.4 | 69.9 | 69.4 | 69.0 | 68.5 | 68.0 | 67.6 | 67.1 | 66.6 | 66.2 | 65.7 | 65.2 | 64.8 | 64.3 | 63.8 | 63.4 | 62.9 | 62.4 | 62.0 |
| 80                     | 71.2      | 70.7 | 70.3 | 69.8 | 69.3 | 68.9 | 68.4 | 67.9 | 67.5 | 67.0 | 66.5 | 66.1 | 65.6 | 65.1 | 64.7 | 64.2 | 63.7 | 63.3 | 62.8 | 62.3 | 61.9 | 61.4 | 60.9 |
| 85                     | 70.2      | 69.7 | 69.2 | 68.8 | 68.3 | 67.8 | 67.4 | 66.9 | 66.4 | 66.0 | 65.5 | 65.0 | 64.6 | 64.1 | 63.6 | 63.2 | 62.7 | 62.2 | 61.8 | 61.3 | 60.9 | 60.4 | 59.9 |
| 90                     | 69.1      | 68.7 | 68.2 | 67.7 | 67.3 | 66.8 | 66.3 | 65.9 | 65.4 | 64.9 | 64.5 | 64.0 | 63.5 | 63.1 | 62.6 | 62.2 | 61.7 | 61.2 | 60.8 | 60.3 | 59.8 | 59.4 | 58.9 |
| 95                     | 68.1      | 67.6 | 67.2 | 66.7 | 66.2 | 65.8 | 65.3 | 64.8 | 64.4 | 63.9 | 63.5 | 63.0 | 62.5 | 62.1 | 61.6 | 61.1 | 60.7 | 60.2 | 59.7 | 59.3 | 58.8 | 58.3 | 57.9 |
| 100                    | 67.1      | 66.6 | 66.2 | 65.7 | 65.2 | 64.8 | 64.3 | 63.8 | 63.4 | 62.9 | 62.4 | 62.0 | 61.5 | 61.0 | 60.6 | 60.1 | 59.6 | 59.2 | 58.7 | 58.2 | 57.8 | 57.3 | 56.8 |

| Predicted FEV1/EVC (%) | Pack-year |      |      |      |      |      |      |      |      |      |      |      |      |      |      |      |      |      |      |      |      |      |      |
|------------------------|-----------|------|------|------|------|------|------|------|------|------|------|------|------|------|------|------|------|------|------|------|------|------|------|
|                        | 0         | 5    | 10   | 15   | 20   | 25   | 30   | 35   | 40   | 45   | 50   | 55   | 60   | 65   | 70   | 75   | 80   | 85   | 90   | 95   | 100  | 105  | 110  |
| Age 40                 | 83.4      | 82.9 | 82.5 | 82.0 | 81.5 | 81.1 | 80.6 | 80.1 | 79.7 | 79.2 | 78.7 | 78.3 | 77.8 | 77.3 | 76.9 | 76.4 | 75.9 | 75.5 | 75.0 | 74.6 | 74.1 | 73.6 | 73.2 |
| 45                     | 82.4      | 81.9 | 81.4 | 81.0 | 80.5 | 80.0 | 79.6 | 79.1 | 78.6 | 78.2 | 77.7 | 77.3 | 76.8 | 76.3 | 75.9 | 75.4 | 74.9 | 74.5 | 74.0 | 73.5 | 73.1 | 72.6 | 72.1 |
| 50                     | 81.3      | 80.9 | 80.4 | 79.9 | 79.5 | 79.0 | 78.6 | 78.1 | 77.6 | 77.2 | 76.7 | 76.2 | 75.8 | 75.3 | 74.8 | 74.4 | 73.9 | 73.4 | 73.0 | 72.5 | 72.0 | 71.6 | 71.1 |
| 55                     | 80.3      | 79.9 | 79.4 | 78.9 | 78.5 | 78.0 | 77.5 | 77.1 | 76.6 | 76.1 | 75.7 | 75.2 | 74.7 | 74.3 | 73.8 | 73.3 | 72.9 | 72.4 | 71.9 | 71.5 | 71.0 | 70.5 | 70.1 |
| 60                     | 79.3      | 78.8 | 78.4 | 77.9 | 77.4 | 77.0 | 76.5 | 76.0 | 75.6 | 75.1 | 74.6 | 74.2 | 73.7 | 73.2 | 72.8 | 72.3 | 71.8 | 71.4 | 70.9 | 70.4 | 70.0 | 69.5 | 69.1 |
| 65                     | 78.3      | 77.8 | 77.3 | 76.9 | 76.4 | 75.9 | 75.5 | 75.0 | 74.5 | 74.1 | 73.6 | 73.1 | 72.7 | 72.2 | 71.7 | 71.3 | 70.8 | 70.4 | 69.9 | 69.4 | 69.0 | 68.5 | 68.0 |
| 70                     | 77.2      | 76.8 | 76.3 | 75.8 | 75.4 | 74.9 | 74.4 | 74.0 | 73.5 | 73.1 | 72.6 | 72.1 | 71.7 | 71.2 | 70.7 | 70.3 | 69.8 | 69.3 | 68.9 | 68.4 | 67.9 | 67.5 | 67.0 |
| 75                     | 76.2      | 75.7 | 75.3 | 74.8 | 74.4 | 73.9 | 73.4 | 73.0 | 72.5 | 72.0 | 71.6 | 71.1 | 70.6 | 70.2 | 69.7 | 69.2 | 68.8 | 68.3 | 37.8 | 67.4 | 66.9 | 66.4 | 66.0 |
| 80                     | 75.2      | 74.7 | 74.3 | 73.8 | 73.3 | 72.9 | 72.4 | 71.9 | 71.5 | 71.0 | 70.5 | 70.1 | 69.6 | 69.1 | 68.7 | 68.2 | 67.7 | 67.3 | 66.8 | 66.3 | 65.9 | 65.4 | 64.9 |
| 85                     | 74.2      | 73.7 | 73.2 | 72.8 | 72.3 | 71.8 | 71.4 | 70.9 | 70.4 | 70.0 | 69.5 | 69.0 | 68.6 | 68.1 | 67.6 | 67.2 | 66.7 | 66.2 | 65.8 | 65.3 | 64.9 | 64.4 | 63.9 |
| 90                     | 73.1      | 72.7 | 72.2 | 71.7 | 71.3 | 70.8 | 70.3 | 69.9 | 69.4 | 68.9 | 68.5 | 68.0 | 67.5 | 67.1 | 66.6 | 66.2 | 65.7 | 65.2 | 64.8 | 64.3 | 63.8 | 63.4 | 62.9 |
| 95                     | 72.1      | 71.6 | 71.2 | 70.7 | 70.2 | 69.8 | 69.3 | 68.9 | 68.4 | 67.9 | 67.5 | 67.0 | 66.5 | 66.1 | 65.6 | 65.1 | 64.7 | 64.2 | 63.7 | 63.3 | 62.8 | 62.3 | 61.9 |
| 100                    | 71.1      | 70.6 | 70.2 | 69.7 | 69.2 | 68.8 | 68.3 | 67.8 | 67.4 | 66.9 | 66.4 | 66.0 | 65.5 | 65.0 | 64.6 | 64.1 | 63.6 | 63.2 | 62.7 | 62.2 | 61.8 | 61.3 | 60.8 |

| Predicted FEV1/EVC (%) | Pack-year |      |      |      |      |      |      |      |      |      |      |      |      |      |      |      |      |      |      |      |      |      |      |
|------------------------|-----------|------|------|------|------|------|------|------|------|------|------|------|------|------|------|------|------|------|------|------|------|------|------|
|                        | 0         | 5    | 10   | 15   | 20   | 25   | 30   | 35   | 40   | 45   | 50   | 55   | 60   | 65   | 70   | 75   | 80   | 85   | 90   | 95   | 100  | 105  | 110  |
| Age 40                 | 77.6      | 77.1 | 76.6 | 76.2 | 75.7 | 75.2 | 74.8 | 74.3 | 73.8 | 73.4 | 72.9 | 72.4 | 72.0 | 71.5 | 71.0 | 70.6 | 70.1 | 69.6 | 69.2 | 68.7 | 68.2 | 67.8 | 67.3 |
| 45                     | 76.5      | 76.1 | 75.6 | 75.1 | 74.7 | 74.2 | 73.7 | 73.3 | 72.8 | 72.3 | 71.9 | 71.4 | 70.9 | 70.5 | 70.0 | 69.5 | 69.1 | 68.6 | 68.1 | 67.7 | 67.2 | 66.8 | 66.3 |
| 50                     | 75.5      | 75.0 | 74.6 | 74.1 | 73.6 | 73.2 | 72.7 | 72.2 | 71.8 | 71.3 | 70.8 | 70.4 | 69.9 | 69.4 | 69.0 | 68.5 | 68.1 | 67.6 | 67.1 | 66.7 | 66.2 | 65.7 | 65.3 |
| 55                     | 74.5      | 74.0 | 73.5 | 73.1 | 72.6 | 72.1 | 71.7 | 71.2 | 70.8 | 70.3 | 69.8 | 69.4 | 68.9 | 68.4 | 68.0 | 67.5 | 67.0 | 66.6 | 66.1 | 65.6 | 65.2 | 64.7 | 64.2 |
| 60                     | 73.4      | 73.0 | 72.5 | 72.1 | 71.6 | 71.1 | 70.7 | 70.2 | 69.7 | 69.3 | 68.8 | 68.3 | 67.9 | 67.4 | 66.9 | 66.5 | 66.0 | 65.5 | 65.1 | 64.6 | 64.1 | 63.7 | 63.2 |
| 65                     | 72.4      | 72.0 | 71.5 | 71.0 | 70.6 | 70.1 | 69.6 | 69.2 | 68.7 | 68.2 | 67.8 | 67.3 | 66.8 | 66.4 | 65.9 | 65.4 | 65.0 | 64.5 | 64.0 | 63.6 | 63.1 | 62.6 | 62.2 |
| 70                     | 71.4      | 70.9 | 70.5 | 70.0 | 69.5 | 69.1 | 68.6 | 68.1 | 67.7 | 67.2 | 66.7 | 66.3 | 65.8 | 65.3 | 64.9 | 64.4 | 63.9 | 63.5 | 63.0 | 62.6 | 62.1 | 61.6 | 61.2 |
| 75                     | 70.4      | 69.9 | 69.4 | 69.0 | 68.5 | 68.0 | 67.6 | 67.1 | 66.6 | 66.2 | 65.7 | 65.2 | 64.8 | 64.3 | 63.9 | 63.4 | 62.9 | 62.5 | 62.0 | 61.5 | 61.1 | 60.6 | 60.1 |
| 80                     | 69.3      | 68.9 | 68.4 | 67.9 | 67.5 | 67.0 | 66.6 | 66.1 | 65.6 | 65.2 | 64.7 | 64.2 | 63.8 | 63.3 | 62.8 | 62.4 | 61.9 | 61.4 | 61.0 | 60.5 | 60.0 | 59.6 | 59.1 |
| 85                     | 68.3      | 67.9 | 67.4 | 66.9 | 66.5 | 66.0 | 65.5 | 65.1 | 64.6 | 64.1 | 63.7 | 63.2 | 62.7 | 62.3 | 61.8 | 61.3 | 60.9 | 60.4 | 59.9 | 59.5 | 59.0 | 58.5 | 58.1 |
| 90                     | 67.3      | 66.8 | 66.4 | 65.9 | 65.4 | 65.0 | 64.5 | 64.0 | 63.6 | 63.1 | 62.6 | 62.2 | 61.7 | 61.2 | 60.8 | 60.3 | 59.8 | 59.4 | 58.9 | 58.4 | 58.0 | 57.5 | 57.1 |
| 95                     | 66.3      | 65.8 | 65.3 | 64.9 | 64.4 | 63.9 | 63.5 | 63.0 | 62.5 | 62.1 | 61.6 | 61.1 | 60.7 | 60.2 | 59.7 | 59.3 | 58.8 | 58.4 | 57.9 | 57.4 | 57.0 | 56.5 | 5    |
